# Supplementary material for: Exploring peptidomes of by-products generated duringchhurpiproduction usingLactobacillus delbrueckiiWS4 for identification of novel bioactive peptides
Source: Royal Society of Chemistry journal article supplement (doi:10.1039/d4fo00405a), 2024-01-01
Supplement: d4fo00405a1.pdf [file d4fo00405a1.pdf]

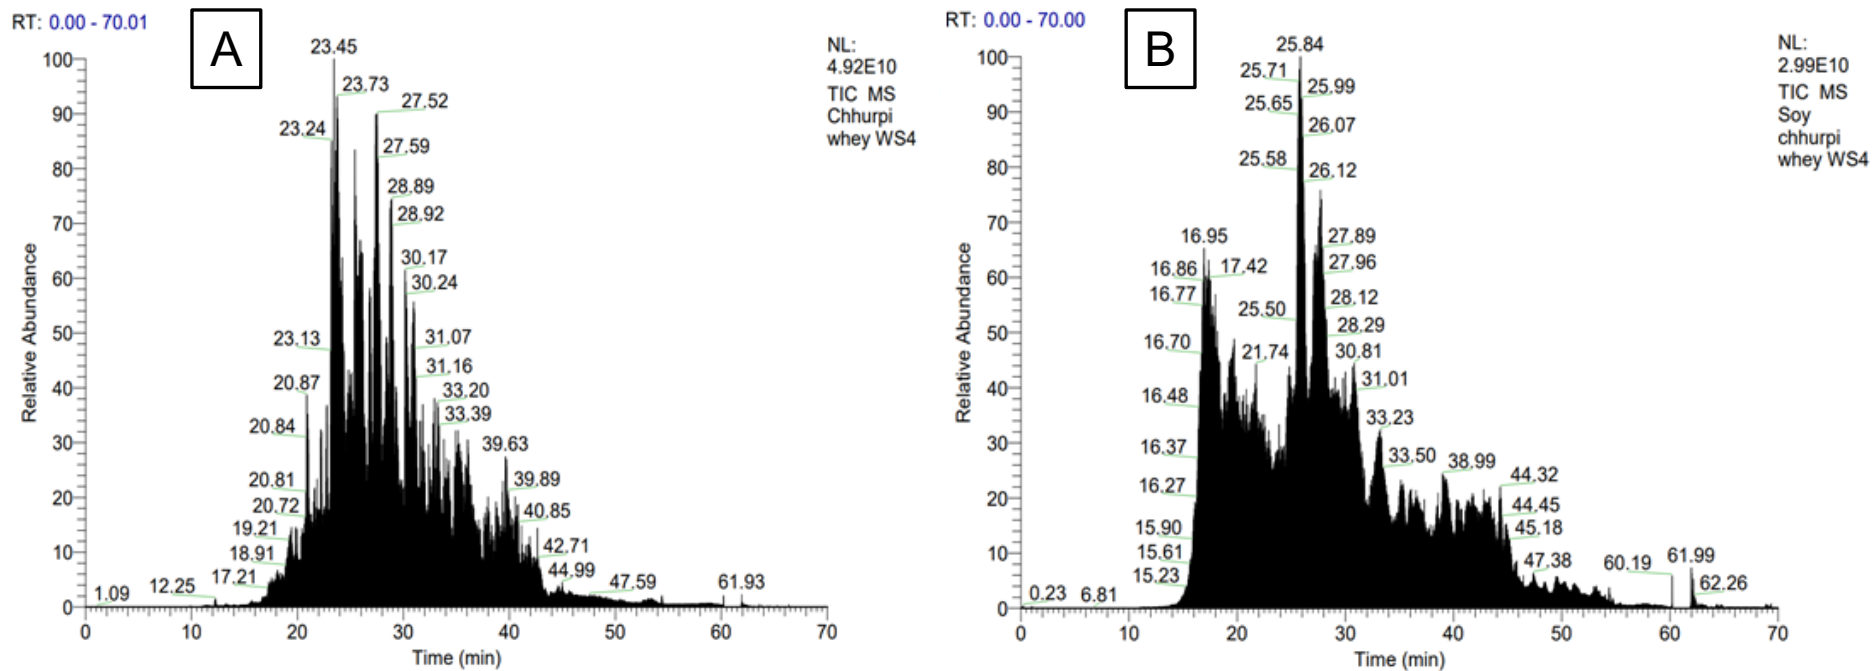

**Supplementary Figure 1.** Total ion chromatogram (TIC) acquired following LC-MS/MS analysis of whey samples. A) Whey; B) Soy whey. *L. delbrueckii* WS4 was employed as the fermenting strain..

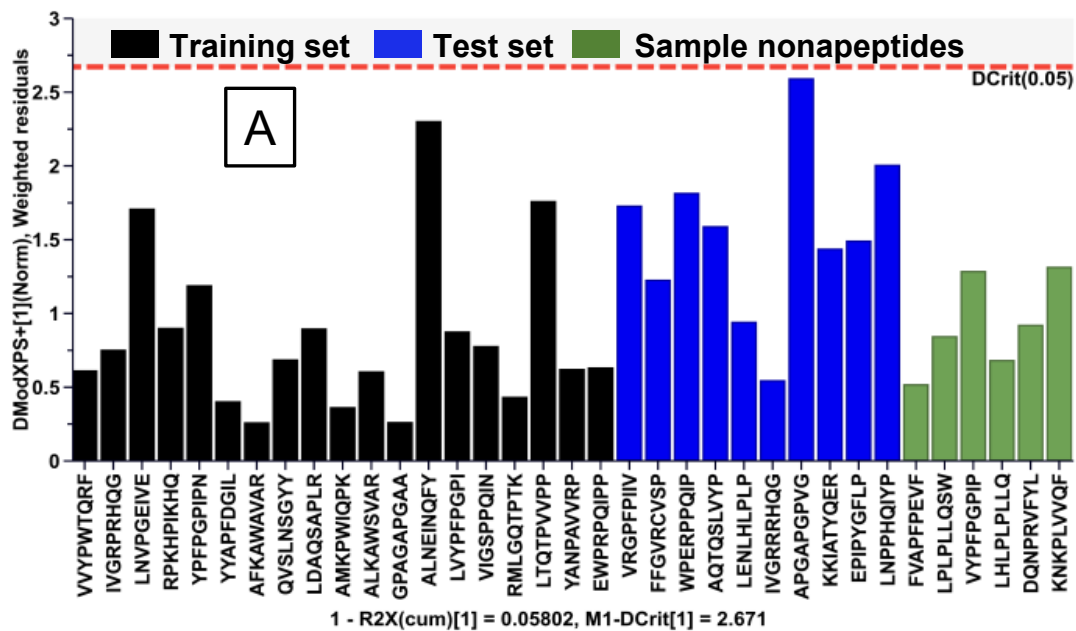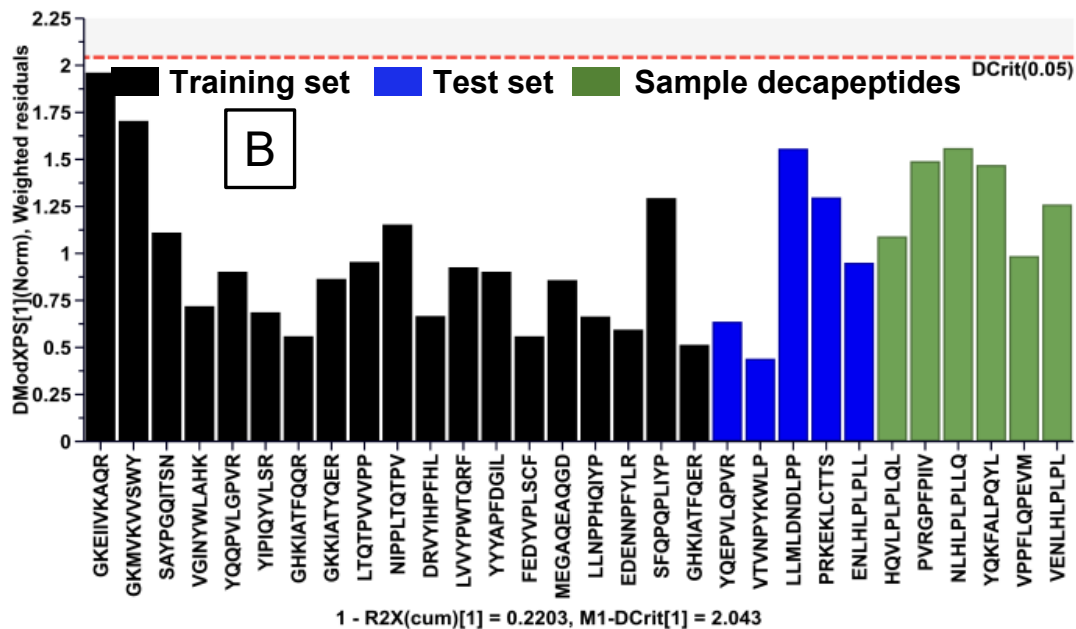

**Supplementary Figure 2.** Applicability domain plots for ACE-inhibitory nona- and deca-peptides using QSAR PLS models, encompassing the training set, test set, and sample peptides. DModXPS+ analysis indicated that all nona- (A) and deca-peptides (B) from whey and soy whey fell within the critical range (0.05) of the QSAR models' domain.
