# Supplementary material for: Exploring peptidomes of by-products generated duringchhurpiproduction usingLactobacillus delbrueckiiWS4 for identification of novel bioactive peptides
Source: Royal Society of Chemistry journal article supplement (doi:10.1039/d4fo00405a), 2024-01-01
Supplement: d4fo00405a2.pdf [file d4fo00405a2.pdf]

**Supplementary Table 1.** Radical scavenging activity of whey and soy whey generated as by-products of *chhurpi* and soy *chhurpi* production using selected LAB strains.

| Fermenting starter         | DPPH radical scavenging activity (mg AAE/g sample) | SRSA (mg AAE/g sample)   | Reducing power potential (mg AAE/g sample) | TAA (mg AAE/g sample)    |
|----------------------------|----------------------------------------------------|--------------------------|--------------------------------------------|--------------------------|
| <b>Whey</b>                |                                                    |                          |                                            |                          |
| <i>L. delbrueckii</i> WS15 | 0.061 ± 0.003 <sup>c</sup>                         | 1.07 ± 0.07 <sup>b</sup> | 0.18 ± 0.01 <sup>b</sup>                   | 1.24 ± 0.04 <sup>c</sup> |
| <i>L. delbrueckii</i> WS28 | 0.065 ± 0.004 <sup>c</sup>                         | 1.05 ± 0.10 <sup>b</sup> | 0.18 ± 0.01 <sup>b</sup>                   | 1.20 ± 0.01 <sup>c</sup> |
| <i>L. delbrueckii</i> WS12 | 0.124 ± 0.008 <sup>b</sup>                         | 1.49 ± 0.07 <sup>a</sup> | 0.41 ± 0.02 <sup>a</sup>                   | 2.32 ± 0.05 <sup>b</sup> |
| <i>L. delbrueckii</i> WS4  | 0.170 ± 0.022 <sup>a</sup>                         | 1.59 ± 0.07 <sup>a</sup> | 0.38 ± 0.01 <sup>a</sup>                   | 2.54 ± 0.09 <sup>a</sup> |
| <i>E. durans</i> ES93      | 0.126 ± 0.003 <sup>b</sup>                         | 1.19 ± 0.05 <sup>b</sup> | 0.37 ± 0.04 <sup>a</sup>                   | 2.54 ± 0.02 <sup>a</sup> |
| <b>Soy whey</b>            |                                                    |                          |                                            |                          |
| <i>L. delbrueckii</i> WS15 | 0.127 ± 0.003 <sup>c</sup>                         | 0.45 ± 0.02 <sup>c</sup> | 0.15 ± 0.01 <sup>b</sup>                   | 1.12 ± 0.02 <sup>d</sup> |
| <i>L. delbrueckii</i> WS28 | 0.145 ± 0.004 <sup>d</sup>                         | 0.39 ± 0.02 <sup>c</sup> | 0.19 ± 0.02 <sup>b</sup>                   | 1.32 ± 0.03 <sup>c</sup> |
| <i>L. delbrueckii</i> WS12 | 0.220 ± 0.004 <sup>b</sup>                         | 0.78 ± 0.03 <sup>a</sup> | 0.36 ± 0.01 <sup>a</sup>                   | 1.88 ± 0.02 <sup>b</sup> |
| <i>L. delbrueckii</i> WS4  | 0.244 ± 0.003 <sup>a</sup>                         | 0.82 ± 0.02 <sup>a</sup> | 0.40 ± 0.01 <sup>a</sup>                   | 2.12 ± 0.04 <sup>a</sup> |
| <i>E. durans</i> ES93      | 0.183 ± 0.006 <sup>c</sup>                         | 0.57 ± 0.02 <sup>b</sup> | 0.19 ± 0.01 <sup>b</sup>                   | 1.20 ± 0.03 <sup>d</sup> |

DPPH – 2,2-diphenyl-1-picrylhydrazyl; SRSA – superoxide radical scavenging activity; TAA – total antioxidant activity; AAE – ascorbic acid equivalent.

**Supplementary Table 2.** ACE molecular docking of antihypertensive activity predicted 9 (nona) and 10 (deca) residue peptides identified in whey and soy whey released during cheese production using *L. delbrueckii* WS4.

| Peptide     | Peptidyl residue | ACE residue | Interaction type         | Bond distance (Å) | Binding (kcal/mol) | Energy |
|-------------|------------------|-------------|--------------------------|-------------------|--------------------|--------|
| <b>Whey</b> |                  |             |                          |                   |                    |        |
| HQVLPLPLQL  | LEU6             | HIS387      | $\pi$ Alkyl              | 4.62              | -12.5              |        |
|             | LEU4             | HIS387      | $\pi$ Alkyl              | 4.95              |                    |        |
|             | VAL3             | HIS383      | $\pi$ Alkyl              | 5.36              |                    |        |
|             | VAL3             | TYR520      | $\pi$ Alkyl              | 5.42              |                    |        |
|             | LEU4             | ALA354      | Alkyl                    | 5.14              |                    |        |
|             | PRO5             | ALA354      | Carbon Hydrogen Bond     | 1.78              |                    |        |
|             | PRO5             | HIS513      | $\pi$ Alkyl              | 4.63              |                    |        |
| FVAPFPEVF   | LEU4             | GLU384      | Carbon Hydrogen Bond     | 2.47              | -13.2              |        |
|             | VAL8             | HIS513      | Carbon Hydrogen Bond     | 3.02              |                    |        |
|             | GLU7             | HIS513      | Carbon Hydrogen Bond     | 2.51              |                    |        |
|             | PHE9             | HIS383      | CHB                      | 2.17              |                    |        |
|             | VAL8             | ALA354      | Alkyl                    | 2.89              |                    |        |
|             | VAL8             | HIS353      | $\pi$ Alkyl              | 3.98              |                    |        |
|             | VAL8             | GLU384      | Carbon Hydrogen Bond     | 2.54              |                    |        |
| PVRGPFPIIV  | PHE9             | TYR523      | $\pi$ - $\pi$ Pi Stacked | 4.79              | -11.8              |        |
|             | VAL2             | HIS513      | Carbon Hydrogen Bond     | 1.53              |                    |        |
|             | ARG3             | HIS353      | Carbon Hydrogen Bond     | 2.61              |                    |        |
|             | VAL2             | HIS353      | Carbon Hydrogen Bond     | 2.50              |                    |        |
|             | GLY4             | HIS353      | CHB                      | 2.77              |                    |        |
|             | ARG3             | HIS383      | $\pi$ Alkyl              | 3.54              |                    |        |
|             | VAL2             | LYS511      | CHB                      | 2.93              |                    |        |
|             | VAL2             | HIS513      | Carbon Hydrogen Bond     | 1.53              |                    |        |
|             | ARG3             | TYR523      | $\pi$ Alkyl              | 5.31              |                    |        |
|             | ARG3             | GLU411      | Attractive Charge        | 5.51              |                    |        |

|            |      |        |                       |      |       |
|------------|------|--------|-----------------------|------|-------|
|            | ARG3 | GLU384 | Carbon Hydrogen Bond  | 2.28 |       |
|            | ARG3 | GLU384 | CHB                   | 2.66 |       |
| NLHLPLPLLQ | HIS3 | HIS353 | CHB                   | 2.84 | -12.8 |
|            | HIS3 | GLU384 | CHB                   | 1.59 |       |
|            | HIS3 | HIS387 | $\pi$ Lone Pair       | 2.58 |       |
|            | HIS3 | HIS387 | $\pi$ Lone Pair       | 2.93 |       |
|            | HIS3 | HIS387 | $\pi$ - $\pi$ Stacked | 3.39 |       |
|            | LEU4 | ALA354 | CHB                   | 2.85 |       |
|            | ASN1 | TYR520 | CHB                   | 1.84 |       |
| NLHLPLPL   | HIS3 | HIS513 | CHB                   | 2.65 | -11.1 |
|            | HIS3 | GLU384 | CHB                   | 2.42 |       |
|            | HIS3 | GLU384 | CHB                   | 2.44 |       |
|            | HIS3 | HIS387 | $\pi$ - $\pi$ Stacked | 3.34 |       |
|            | HIS3 | HIS387 | $\pi$ Lone Pair       | 2.79 |       |
|            | HIS3 | GLU411 | Carbon Hydrogen Bond  | 2.62 |       |
|            | LEU4 | ALA354 | CHB                   | 2.68 |       |
| LPLPLLQSW  | LEU3 | HIS410 | $\pi$ Sigma           | 2.70 | -9.7  |
| LPLPLLQ    | LEU5 | HIS387 | $\pi$ Sigma           | 1.75 | -10.5 |
|            | LEU6 | HIS353 | Carbon Hydrogen Bond  | 2.45 |       |
|            | GLN7 | GLU411 | CHB                   | 1.53 |       |
| LHLPLPLLQ  | LEU3 | HIS387 | $\pi$ Alkyl           | 4.17 | -11.6 |
|            | LEU1 | HIS513 | $\pi$ Alkyl           | 4.49 |       |
|            | LEU1 | HIS353 | $\pi$ Alkyl           | 3.69 |       |
| LHLPLPLL   | LEU8 | GLU411 | Carbon Hydrogen Bond  | 2.31 | -12.2 |
| YQKFALPQYL | GLN2 | HIS353 | Carbon Hydrogen Bond  | 2.76 | -12.2 |
|            | TYR1 | ALA354 | Carbon Hydrogen Bond  | 1.67 |       |
| VPPFLQPEVM | LEU5 | HIS387 | $\pi$ Alkyl           | 5.13 | -10.7 |
|            | GLN6 | HIS387 | Carbon Hydrogen Bond  | 2.84 |       |
|            | GLN6 | GLU384 | CHB                   | 2.61 |       |
| VENLHLPLPL | LEU8 | HIS353 | $\pi$ Alkyl           | 5.10 | -12.0 |

|                 |       |        |                      |      |       |
|-----------------|-------|--------|----------------------|------|-------|
|                 | PRO9  | HIS353 | Carbon Hydrogen Bond | 2.44 |       |
|                 | PRO9  | ALA354 | Alkyl                | 3.50 |       |
|                 | PRO9  | HIS513 | Carbon Hydrogen Bond | 2.30 |       |
|                 | LEU10 | TYR523 | $\pi$ Alkyl          | 4.25 |       |
|                 | LEU8  | TYR523 | CHB                  | 2.69 |       |
|                 | LEU8  | HIS383 | $\pi$ Alkyl          | 5.17 |       |
|                 | PRO7  | HIS513 | $\pi$ Alkyl          | 3.39 |       |
|                 | LEU8  | ALA354 | Alkyl                | 3.43 |       |
|                 | LEU8  | ALA354 | CHB                  | 2.98 |       |
|                 | PRO9  | TYR523 | $\pi$ Alkyl          | 3.73 |       |
|                 | PRO9  | TYR520 | $\pi$ Alkyl          | 4.89 |       |
| VYFPFGPIP       | VAL3  | HIS387 | $\pi$ Alkyl          | 3.78 | -13.6 |
| <b>Soy whey</b> |       |        |                      |      |       |
| KNKPLVVQF       | VAL7  | HIS513 | $\pi$ Alkyl          | 4.90 | -13.8 |
|                 | GLN8  | TYR523 | CHB                  | 1.93 |       |
|                 | GLN8  | ALA354 | CHB                  | 2.20 |       |
|                 | PHE9  | TYR523 | $\pi$ Sigma          | 2.90 |       |
|                 | VAL7  | ALA354 | CHB                  | 2.95 |       |
|                 | GLN8  | HIS513 | CHB                  | 2.61 |       |
| DQNPRVFYL       | PHE7  | HIS383 | $\pi$ Lone Pair      | 2.87 | -11.9 |
|                 | PHE7  | HIS383 | CHB                  | 2.13 |       |
|                 | LEU9  | TYR523 | $\pi$ Alkyl          | 5.37 |       |
|                 | ARG5  | HIS387 | Carbon Hydrogen Bond | 2.97 |       |

ACE – angiotensin-I converting enzyme; CHB – conventional hydrogen bond.
